# Supplementary material for: Network analysis identifies circulating miR-155 as predictive biomarker of type 2 diabetes mellitus development in obese patients: a pilot study
Source: Springer Nature journal article supplement (doi:10.1038/s41598-023-46516-y), 2023-11-09

**Supplementary Figure 1. Expression of driver microRNAs in EV.** The boxplots show the gene expression levels (log-transformed) of the six potential drivers microRNAs in EV across the HD, OB and OBDM samples. Wilcoxon-test was used to perform pairwise-comparisons and statistical significance was indicated by the star symbols (i.e., ns:  $p > 0.05$ , \*:  $p \leq 0.05$ , \*\*:  $p \leq 0.01$ , \*\*\*:  $p \leq 0.001$ , \*\*\*\*:  $p \leq 0.0001$ ).

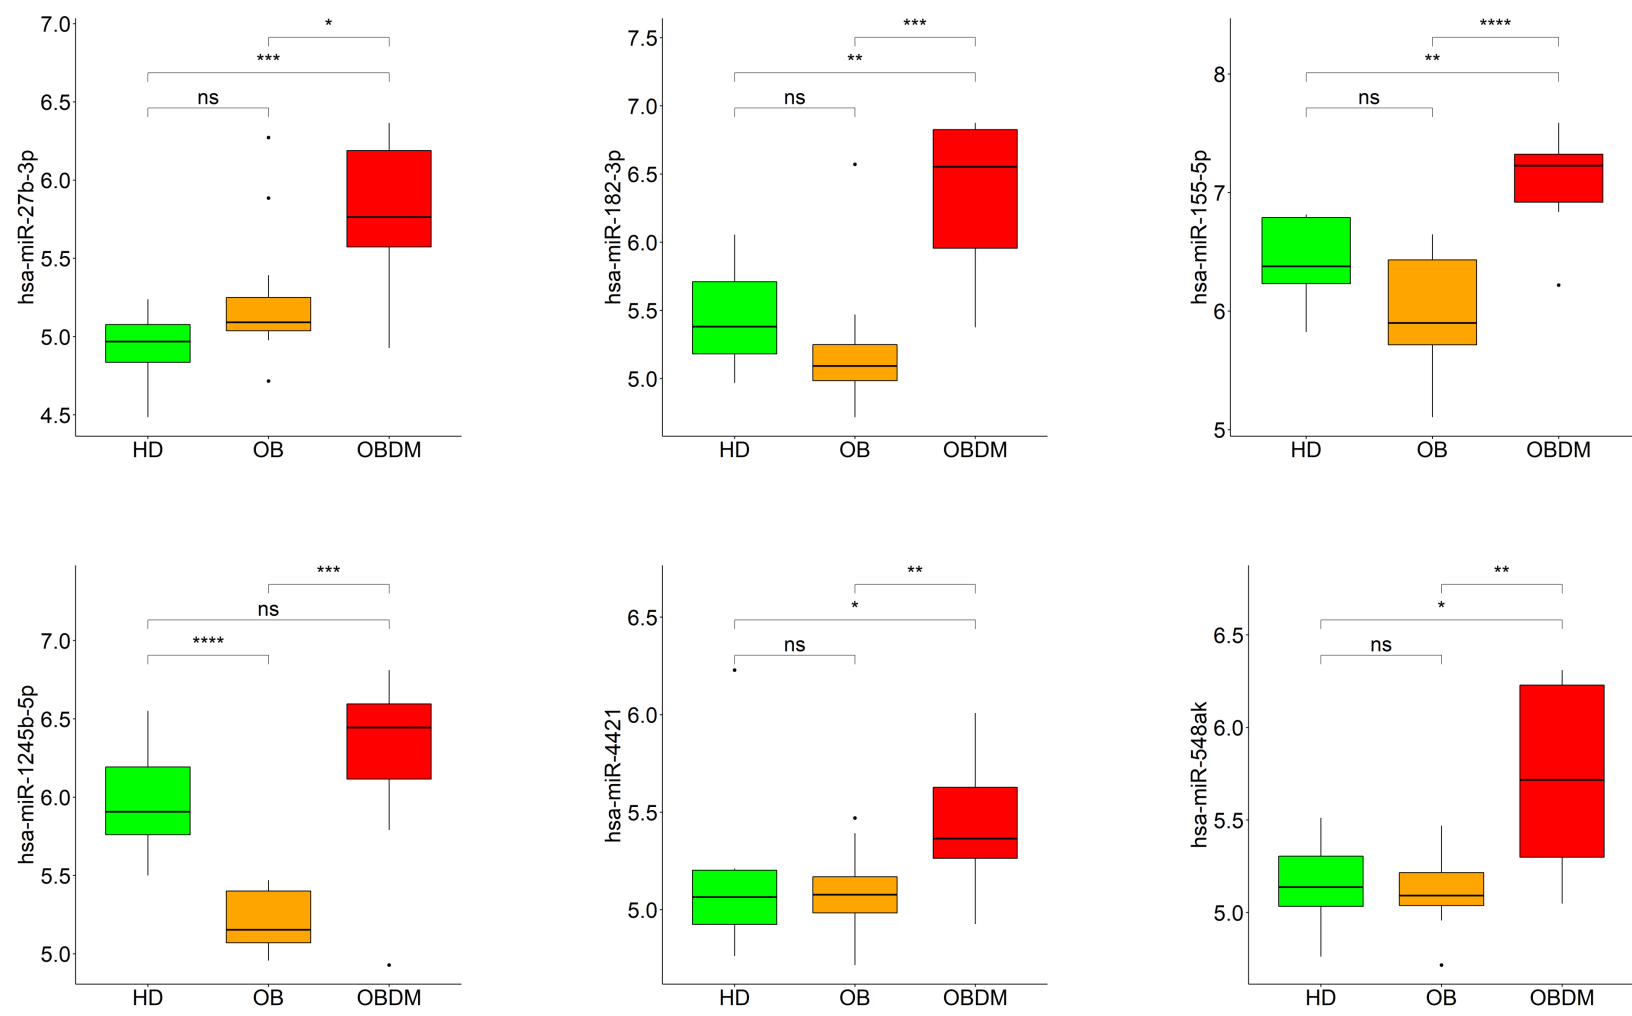

Supplement: MOESM1 [file 41598_2023_46516_MOESM1_ESM.pdf]
